# Supplementary material
Source: PubMed Central journal article supplement (PMC5075105)
Supplement: AAC.01617-16_zac011165632so1.pdf [file AAC.01617-16_zac011165632so1.pdf]

**Table S1. Bacterial strains and plasmids used in this study.**

Table S1

|            | Relevant genotype or characteristic(s)                                                       | Source     |
|------------|----------------------------------------------------------------------------------------------|------------|
| CFT073     | <i>E. coli</i> wild type, clinical isolate                                                   | Mobley, H. |
| Tn library | EZ-Tn5 <sup>TM</sup> <R6Kγori /KAN-2> transposon library in <i>E. coli</i> CFT073 background | Mobley, H. |
| ybhK::kan  | CFT073 ΔybhK::aph, Kan <sup>R</sup>                                                          | This study |
| nmpC::kan  | CFT073 ΔnmpC::aph, Kan <sup>R</sup>                                                          | This study |
| mltB::kan  | CFT073 ΔmltB::aph, Kan <sup>R</sup>                                                          | This study |
| nagC::kan  | CFT073 ΔnagC::aph, Kan <sup>R</sup>                                                          | This study |
| acnB::kan  | CFT073 ΔacnB::aph, Kan <sup>R</sup>                                                          | This study |
| c1884::kan | CFT073 Δc1884::aph, Kan <sup>R</sup>                                                         | This study |
| dsbA::kan  | CFT073 ΔdsbA::aph, Kan <sup>R</sup>                                                          | This study |
| udhA::kan  | CFT073 ΔudhA::aph, Kan <sup>R</sup>                                                          | This study |
| cyaA::kan  | CFT073 ΔcyaA::aph, Kan <sup>R</sup>                                                          | This study |
| crp::kan   | CFT073 Δcrp::aph, Kan <sup>R</sup>                                                           | This study |
| ybhK       | CFT073 ΔybhK::FRT                                                                            | This study |
| nmpC       | CFT073 ΔnmpC::FRT                                                                            | This study |
| mltB       | CFT073 ΔmltB::FRT                                                                            | This study |
| nagC       | CFT073 ΔnagC::FRT                                                                            | This study |

|              |                                                                   |                  |
|--------------|-------------------------------------------------------------------|------------------|
| <i>acnB</i>  | CFT073 $\Delta acnB::FRT$                                         | This study       |
| <i>c1884</i> | CFT073 $\Delta c1884::FRT$                                        | This study       |
| <i>dsbA</i>  | CFT073 $\Delta dsbA::FRT$                                         | This study       |
| <i>udhA</i>  | CFT073 $\Delta udhA::FRT$                                         | This study       |
| <i>cyaA</i>  | CFT073 $\Delta cyaA::FRT$                                         | This study       |
| <i>crp</i>   | CFT073 $\Delta crp::FRT$                                          | This study       |
| pKM208       | IPTG-inducible lambda red recombineering system, Amp <sup>R</sup> | Mulvey, M.       |
| pCP20        | Contains flipase recombinase, Amp <sup>R</sup>                    | Laboratory stock |
| pKD4         | Contains kanamycin selection marker used to construct mutants     | Laboratory stock |

**Table S2. DNA sequences of primers used in this study.**

| Name         | Sequence (5'- 3' orientation)                                                             | Purpose                                                                  |
|--------------|-------------------------------------------------------------------------------------------|--------------------------------------------------------------------------|
| PCR-1        | gtggcaagcaaaagttcaaaatca                                                                  | Anneals with EZ-Tn5 <sup>TM</sup> <R6Kγori /KAN-2> specific (1st PCR)    |
| C-tail       | gtgactggagttcagacgtgtgctcttccgatctggggggggggggggg                                         | C-tail complementary                                                     |
| PCR-2        | aatgatacggcgaccaccgagatctacactcttgggtgagatgtgtataagagacag                                 | Nested PCR (2nd PCR)                                                     |
| Sequencing   | acactcttgggtgagatgtgtataagagacag                                                          | Sequencing Primer                                                        |
| BC45G        | caagcagaagacggcatacagagattgtgactgtgactggagttcagacgtgtgctcttccgatctggggggggg<br>ggggggg    | agtcaaca (barcode)                                                       |
| BC46G        | caagcagaagacggcatacagatacggaaactgtgactggagttcagacgtgtgctcttccgatctggggggggg<br>ggggggg    | agttccgt (barcode)                                                       |
| BC47G        | caagcagaagacggcatacagagattctgacatgtgactggagttcagacgtgtgctcttccgatctggggggggg<br>ggggggg   | atgtcaga (barcode)                                                       |
| BC48G        | caagcagaagacggcatacagatcgggacgggtgactggagttcagacgtgtgctcttccgatctggggggggg<br>ggggggggg   | ccgtccc (barcode)                                                        |
| BC49G        | caagcagaagacggcatacagagatgtcggacgtgactggagttcagacgtgtgctcttccgatctggggggggg<br>ggggggggg  | gtccgcac (barcode)                                                       |
| BC50G        | caagcagaagacggcatacagatcgtttcacgtgactggagttcagacgtgtgctcttccgatctggggggggg<br>ggggggg     | gtgaaacg (barcode)                                                       |
| BC51G        | caagcagaagacggcatacagataagccacgtgactggagttcagacgtgtgctcttccgatctggggggggg<br>ggggggggg    | gtggcctt (barcode)                                                       |
| BC52G        | caagcagaagacggcatacagataaccgaaactgtgactggagttcagacgtgtgctcttccgatctggggggggg<br>ggggggggg | gtttcgg (barcode)                                                        |
| BC53G        | caagcagaagacggcatacagattactgtacgggtgactggagttcagacgtgtgctcttccgatctggggggggg<br>ggggggggg | cgtacgta (barcode)                                                       |
| BC54G        | caagcagaagacggcatacagatatccactcgtgactggagttcagacgtgtgctcttccgatctggggggggg<br>ggggggggg   | gagtggat (barcode)                                                       |
| BC55G        | caagcagaagacggcatacagatatatcagtgactggagttcagacgtgtgctcttccgatctggggggggg<br>ggggggggg     | actgatat (barcode)                                                       |
| BC56G        | caagcagaagacggcatacagataaaggaaatgtgactggagttcagacgtgtgctcttccgatctggggggggg<br>ggggggggg  | attcctt (barcode)                                                        |
| F_Kan_cyaA   | ttgtacctatattgagactctgaaacagagactggatgtgtaggctggagctgcttc                                 | Forward primer to construct the mutant with a kanamycin selection marker |
| R_Kan_cyaA   | tcaagaaaactgctgcaacagcggcgcgtcatgctccatataaatatcctccttag                                  | Reverse primer to construct the mutant with a kanamycin selection marker |
| F_check_cyaA | cagttcaacgaccagcccgatgg                                                                   | Check the excision of the kanamycin marker                               |
| R_check_cyaA | ctggacgactgggtggcgacagcg                                                                  | Check the excision of the kanamycin marker                               |
| F_Kan_acnB   | gtgctagaagaataccgtaagcacgtagctgagcgtgccggtgtaggctggagctgcttc                              | Forward primer to construct the mutant with a kanamycin selection marker |

|                      |                                                              |                                                                          |
|----------------------|--------------------------------------------------------------|--------------------------------------------------------------------------|
| R_Kan_acnB           | ttaaaccgcagtctggaaaatcaccccgctccgcttttgcacatgaatatcctccttag  | Reverse primer to construct the mutant with a kanamycin selection marker |
| F_check_acnB         | tcaggcgcagtctgtgtgctgatt                                     | Check the excision of the kanamycin marker                               |
| R_check_acnB         | cacttcatcaagcaaggccaggttt                                    | Check the excision of the kanamycin marker                               |
| F_Kan_nmpC           | atgaatattatcgcgcagtgcacatcatttttaataaaagtgtaggctggagctgcttc  | Forward primer to construct the mutant with a kanamycin selection marker |
| R_Kan_nmpC           | ttagaactgataaacacgacctacagcgacgatgctgctgcatatgaatatcctccttag | Reverse primer to construct the mutant with a kanamycin selection marker |
| F_check_nmpC         | aaattaaggggatactacgtatcgc                                    | Check the excision of the kanamycin marker                               |
| R_check_nmpC         | ggatggttatatcgggaaaaggta                                     | Check the excision of the kanamycin marker                               |
| F_Kan_nagC           | atgacaccaggcggacaagctcagataggtaagtgtgatcgtgtaggctggagctgcttc | Forward primer to construct the mutant with a kanamycin selection marker |
| R_Kan_nagC           | ttaatttccagcaaatgctggagcaaaataccgttagccatgaatatcctccttag     | Reverse primer to construct the mutant with a kanamycin selection marker |
| F_check_nagC         | cgcgatgccgtatattaccggctgc                                    | Check the excision of the kanamycin marker                               |
| R_check_nagC         | tgcccttctggcgacgcaggaatc                                     | Check the excision of the kanamycin marker                               |
| F_Kan_mltB           | ttgagttatgtaaagtcctgatcgggcagtgactaccgctgtgtaggctggagctgcttc | Forward primer to construct the mutant with a kanamycin selection marker |
| R_Kan_mltB           | ttactgcacgcgccagcgccacggctgtcctaactgccatgaatatcctccttag      | Reverse primer to construct the mutant with a kanamycin selection marker |
| F_check_mltB         | tatgggggaagaggccattcattga                                    | Check the excision of the kanamycin marker                               |
| R_check_mltB         | gtgccgacaggcttcttctcactgc                                    | Check the excision of the kanamycin marker                               |
| F_Kan_ybhK           | ttgctgttctcgcgaattgctgctactgtagcgcggataggttaggctggagctgcttc  | Forward primer to construct the mutant with a kanamycin selection marker |
| R_Kan_ybhK           | ttaacctaaagcctgtaatgccctttccagcgcgctatgccatgaatatcctccttag   | Reverse primer to construct the mutant with a kanamycin selection marker |
| F_check_ybhK         | acccggcgaatttcacgacggtea                                     | Check the excision of the kanamycin marker                               |
| R_check_ybhK         | aaggcttgaacaagaaagtggctga                                    | Check the excision of the kanamycin marker                               |
| F_Kan_c1884          | atgcagaaccatacagccggatctggctgcgcgtggcccgttaggctggagctgcttc   | Forward primer to construct the mutant with a kanamycin selection marker |
| R_Kan_c1884          | ttatttccggataaatcccagttcctgtgtgcaagttcacatgaatatcctccttag    | Reverse primer to construct the mutant with a kanamycin selection marker |
| F_check_c1884        | tcagcatcgggatgatgaattcct                                     | Check the excision of the kanamycin marker                               |
| R_check_c1884        | ttgggtttcctcaaaaggtgcagta                                    | Check the excision of the kanamycin marker                               |
| F_Kan_dsbA           | atgaaaaagatttgctgctgctgctggttagtttaggttaggctggagctgcttc      | Forward primer to construct the mutant with a kanamycin selection marker |
| R_Kan_dsbA           | ttatttttctcggacagatatttcacagtatcagcaccatgaatatcctccttag      | Reverse primer to construct the mutant with a kanamycin selection marker |
| F_check_dsbA         | cgggttgaagcggcattcctgaaa                                     | Check the excision of the kanamycin marker                               |
| R_check_dsbA         | gcatgttcaccttttttagcat                                       | Check the excision of the kanamycin marker                               |
| R_check_cassette Kan | gcgcccctgcgctgacagccggaac                                    | Reverse primer to check presence of kanamycin selection marker           |
